# Supplementary material for: Evaluation of Multi-Frequency Bioelectrical Impedance Analysis against Dual-Energy X-ray Absorptiometry for Estimation of Low Muscle Mass in Older Hospitalized Patients
Source: MDPI journal article supplement (doi:10.3390/jcm13010196), 2023-12-29
Supplement: s1 [file s1]

# Supplementary Material

**Table S1.** Medication classes.

| <u>Medication classes with dehydrating effect including ATC</u>   |                                                                                                            |
|-------------------------------------------------------------------|------------------------------------------------------------------------------------------------------------|
| <u>Loop diuretics</u>                                             | Furosemid (C03CA01)                                                                                        |
| Thiazides                                                         | Bendroflumethiazid (C03AB01); Hydrochlorthiazid (C03AA03)                                                  |
| Potassium-sparing diuretics                                       | Amilorid, furosemid (C03EB01)                                                                              |
| RAAS-inhibitors                                                   | Candesartan (C09CA06); Enalapril (C09AA02); Losartan (C09CA01); Ramipril (C09AA05); Valsartan (C09CA03)    |
| <u>Medication classes with overhydrating effect including ATC</u> |                                                                                                            |
| Calcium-antagonists                                               | Amlodipin (C08CA01); Felodipin (C08CA02); Lercanidipin (C08CA13); Nifedipin (C08CA05); Verapamil (C08DA01) |
| Alpha- and beta-blockers                                          | Carvedilol (C07AG02); Metoprolol (C07AB02)                                                                 |
| NSAIDs                                                            | Ibuprofen (M01AE01)                                                                                        |
| glucocorticoids                                                   | Prednisolon (H02AB06)                                                                                      |
| Urinary tract agents                                              | Alfuzosin (G04CA01); Mirabegron (G04BD12); Tamsulosin (G04CA02)                                            |

**Table S2.** Medication related to hydration.

|                                        | <b>Total (=42)</b> | <b>Female (n=27)</b> | <b>Male (n=15)</b> |
|----------------------------------------|--------------------|----------------------|--------------------|
| Medication dehydrating effect, n (%)   | 25 (60%)           | 16 (59%)             | 9 (60%)            |
| Loop diuretics, n (%)                  | 16 (38%)           | 10 (37%)             | 6 (40%)            |
| Thiazides, n (%)                       | 7 (17%)            | 4 (15%)              | 3 (20%)            |
| Potassium-sparing diuretics, n (%)     | 1 (2%)             | 1 (4%)               | 0 (0%)             |
| RAAS-inhibitors, n (%)                 | 17 (41%)           | 11 (41%)             | 6 (40%)            |
| Medication overhydrating effect, n (%) | 22 (52%)           | 12 (44%)             | 10 (67%)           |
| Calcium-antagonists, n (%)             | 11 (26%)           | 6 (22%)              | 5 (33%)            |
| Alpha- and beta-blockers, n (%)        | 11 (26%)           | 5 (19%)              | 6 (40%)            |
| NSAIDs, n (%)                          | 4 (10%)            | 3 (11%)              | 1 (7%)             |
| Glucocorticoids, n (%)                 | 2 (5%)             | 1 (4%)               | 1 (7%)             |
| Urinary tract agents, n (%)            | 5 (12%)            | 2 (7%)               | 3 (20%)            |
